# Supplementary material
Source: publisher figshare collection journal article supplement (https://tandf.figshare.com/ndownloader/files/17361281)
Supplement: Supplementary file 1 [file 17361281]

>672-Hyleoglomerid_sp1
GTCAAAAAAAGTAGTATTAAAGTTTCGATCTGTCAACAACATAGTAATCCCCCCCGCTAAAACAGGCAACGACAATAATAGCAAAATAGCAGTAATTTTTACAGCCCAAACAAACAATGGTATTCGCTCTAACAATATTCCGCTAGTTCGTATATTTAAAATAGTTGTAATAAAATTAATAGCCCCTAAAATAGAAGAAGCCCCTGCAAGGTGTAAAGAAAAAATAGTAAAATCCACAGAACTTCCTGCATGAGCAATCCCTCCCGCTAGTGGAGGATACACAGTTCACCCAGTTCCAGTTCCGCTTTCTACTAAAGAAGATCTAATTAATAAAATAAAAGAAGGGGGTAATAATCAAAAACTCAAATTATTCAACCGCGGAAAGGCCATATCTGGGGCCCCCAATATTAAAGGAACTAATCAGTTTCCAAACCCCCCAATTATGATAGGTATAACCATAAAAAAAATTATTACAAAAGCATGTCTAGTCACAATCACATTATAAATTTGGTCATCCCCAATTAAGCTTCCTGGAAATCCAAGCTCAGTTCGAATAATTATTCTCATAGCTGTTCCCACTATCGCAGCTCGA
>673-Hyleoglomerid_sp2
GTCAAAAAAAGTTGTATTAAAATTACGGTCTGTTAATAATATAGTAATTCCTCCCGCTAAAACAGGTAAAGACAATAATAATAAAATTGCAGTAATTTTTACAGCCCATACAAATAAAGGTATACGTTCTAATAATATTCCGCTAGTTCGCATATTTAAAATAGTAGTAATAAAATTAATAGCCCCTAAAATAGAAGATGCTCCAGCAAGATGTAGTGAAAAAATAGTAAAATCTACAGCACTACCAGCATGCGCAATTCCTCCCGCTAAAGGGGGATATACAGTTCACCCTGTTCCAGTACCGCTTTCAACTAAAGAAGAACTAATAAGTAAAATAAAGGAAGGGGGCAATAATCAAAAACTCAAATTATTTAACCGAGGAAAAGCTATATCTGGAGCTCCCAATATTAAAGGTACCAACCAATTACCAAAACCACCAATTATAATAGGCATCACCATAAAAAAAATTATTACAAATGCATGTCTAGTGACAATTACATTGTAAATTTGATCATCCCCAATTAAACTCCCAGGAAACCCCAACTCTGTCCGAATAATTATTCTTATAGCTGTACCTACTATTGCAGCTCAA
>JQ074180-Trachysphaera_sp
GTCAAAAAAAGTAGTATTAAAATTTCGATCTGTTAATAATATTGTAATCCCTCCCGCTAATACAGGTAATGAAAGTAATAATAAAATGGCAGTAATTTTTACAGCTCACACAAATAAAGGCATCCGCTCTAATAATATACCTCTAGTCCGCATATTTAAAATAGTAGTAATAAAATTAATAGCCCCTAAAATAGAAGAGGCCCCCGCTAAGTGTAATGAAAAAATAGTAAAATCCACGGATCTTCCAGCATGCGCAATTCCGCTCGCTAAAGGCGGGTACACAGTTCATCCTGTCCCTGTTCCTCTTTCCACTAAAGAAGATCTAATTAACAAAATAAAAGACGGAGGCAATAATCAAAAACTTAAATTATTTAATCGAGGAAAGGCTATATCTGGTGCCCCTAATATTAAAGGGACTAGTCAATTTCCAAACCCCCCAATTATAATGGGCATAACTATAAAAAAAATTATTACAAAAGCATGACTAGTGACAATTACGTTATAAATCTGATCATCTCCAATCAATCTTCCAGGAAACCCAAGTTCAGTTCGAATAATTATACTTATAGCAGTTCCTACTATAGCCGCCCAT
>KJ408481-Trachysphaera_schmidtii
GTCAAAAAAGGTAGTATTGAAATTTCGATCTGTTAATAACATTGTAATTCCTCCGGCTAACACAGGTAAAGATAACAATAATAAAATAGCAGTAATTTTTACAGCCCAAACAAATAGAGGTATTCGCTCTAATAATATTCCTCTAGTTCGTATATTTAAAATAGTAGTAATAAAATTAATAGCCCCTAAAATAGAAGAGGCTCCGGCTAGGTGTAATGAAAAAATAGTAAAATCTACCGAACTTCCTGCATGAGCAATTCCTCTGGCTAAAGGGGGGTATACTGTCCACCCAGTTCCTGTTCCTCTTTCTACTAATGAAGATCTGATTAATAAAATAAAAGAAGGGGGTAATAGCCAAAAACTTAAATTATTCAGTCGAGGAAATGCTATATCAGGAGCACCCAATATCAAAGGAACTAATCAATTACCAAATCCCCCAATTATAATAGGCATAACTATAAAAAAAATTATTACAAAAGCGTGGCTAGTAACAATTACATTATAAATCTGGTCATCTCCAATTAATCTTCCTGGAAAGCCCAGCTCAGTCCGAATAATTATGCTTATAGCAGTTCCTACTATAGCAGCTCCC
>KJ408508-Trachysphaera_lobata
GTCAAAAAAAGTTGTATTAAAATTACGGTCAGTTAATAATATAGTAATTCCTCCGGCTAAAACAGGTAATGATAGTAACAATAAAATGGCTGTAATTTTTACTGCTCATACAAATAAAGGCATTCGTTCCAACAACATTCCACTTGTTCGTATATTTAAAATTGTAGTAATAAAATTAATAGCCCCTAAAATAGATGAGGCCCCAGCTAAGTGTAACGAAAAAATAGTAAAATCAACTGAACTCCCAGCATGGGCAATACCACTAGCTAAAGGAGGATAGACTGTCCACCCTGTCCCTGTCCCTCTCTCTACTAACGAAGATCTAATTAATAAAATAAAAGAAGGAGGCAATAATCAAAATCTTAAATTATTTAATCGAGGAAAAGCCATATCCGGTGCACCTAACATTAAAGGCACTAACCAATTACCAAACCCTCCAATTATAATAGGTATCACCATAAAAAAAATTATAACAAAAGCGTGACTAGTAACAATTACATTATAAATCTGATCATCTCCAATCAATCTCCCAGGAAACCCCAATTCTGTTCGAATAATTATTCTTATAGCAGTTCCCACTATTGCAGCTCAA
>HM888106-Glomeris_undulata
ATCAAAAAAAGTAGTATTAAAATTTCGATCCGTTAATAATATTGTAATCCCTCCTGCTAATACCGGTAAAGACAATAATAATAAAATGGCCGTAAGTTTAACCGCTCACACAAATAATGGTATTCGTTCTAATAATATACCACTAGTTCGTATGTTCAAAATAGTAGTAATAAAATTAATAGCTCCTAAAATAGAAGAGGCTCCTGCCAAATGAAGAGAAAAAATAGTAAAATCTACAGATCTTCCCGCATGCGCAATTCCCCCTGCTAAAGGCGGATACACAGTTCACCCTGTTCCCGTTCCACTTTCAACTAATGACGAACTAATTAATAAAATAAATGAGGGGGGAAGAAGTCAAAAACTTAAATTATTTAATCGAGGAAAAGCCATATCTGGTGCCCCCAACATTAATGGGACTAATCAATTACCAAAACCCCCAATTATAATGGGCATTACCATAAAAAAAATCATTACAAATGCATGACTTGTAACAATGACATTATAAATTTGATCATCTCCAATTAAACTCCCGGGAAAGCCTAGCTCAGTACGAATAATTATTCTTATTGCAGTCCCTACTATAGCAGCTCAT
>HM888105-Glomeris_tetrasticha
GTCAAAGAAAGTAGTATTAAAATTTCGATCTGTTAACAATATTGTGATTCCACCAGCTAATACAGGCAAAGACAGTAACAATAAAATTGCAGTCAATTTAACTGCCCACACAAATAACGGTATCCGCTCCAATAACATCCCTCTCGTTCGCATGTTTAAAATAGTTGTGATAAAATTAATTGCCCCTAAAATAGAAGACGCCCCCGCTAAATGCAAAGAAAAAATAGTAAAATCAACAGAGCTTCCCGCATGAGCAATACCCCCGGCCAAAGGAGGATACACTGTTCACCCTGTCCCTGTTCCACTCTCTACCAAAGACGAACTAATTAATAAGATAAATGAAGGGGGGAGTAATCAGAAACTTAAATTATTTAGTCGAGGAAAAGCCATGTCTGGTGCCCCTAGCATCAATGGCACTAATCAATTTCCAAATCCTCCAATCATAATTGGTATTACTATAAAAAAAATTATTACAAATGCGTGACTTGTAACAATAACATTATAAATCTGGTCATCTCCAATTAAACTCCCGGGAAATCCTAGTTCAGTACGAATAATTATACTTATAGCAGTCCCCACCATGGCTGCTCAC
>HM888109-Glomeris_marginata
ATCAAAAAAAGTAGTATTAAAATTTCGATCAGTTAATAGTATTGTAATTCCCCCCGCTAAAACAGGTAACGAAAGTAGCAACAAAATAGCAGTAATTTTCACCGCTCACACAAATAAAGGTATACGTTCCAATAATATTCCTCTTGTTCGCATATTTAAAATTGTCGTAATAAAATTAATAGCCCCTAAAATAGAAGAGGCCCCCGCTAGATGAAGAGAAAAAATAGTAAAGTCTACAGAACTCCCCGCATGGGCAATTCCTCCTGCTAAAGGAGGGTAAACAGTTCACCCCGTTCCTGTCCCGCTTTCAACCAAGGAAGAACTAAGTAATAAAATAAAAGAGGGCGGAAGCAATCAAAAACTTAAATTATTTAACCGAGGAAAAGCCATGTCCGGCGCCCCTAACATTAACGGAACTAGCCAATTTCCAAAACCTCCAATCATGATAGGCATAACCATAAAAAAAATCATTACAAAAGCATGTCTTGTCACAATAACATTATAAATTTGATCGTCTCCAATTAAACTCCCGGGAAATCCCAACTCAGTTCGAATAATTATTCTTATCGCAGTGCCCACTATGGCAGCTCAC
>HM888101-Glomeris_intermedia
ATCAAAAAAAGTAGTATTAAAATTTCGATCCGTTAATAATATTGTAATTCCCCCCGCCAACACTGGTAAAGACAATAACAATAAAATTGCAGTAAGCTTAACCGCTCATACAAATAGCGGTATCCGCTCTAGTAATATTCCACTAGTCCGCATATTTAAAATAGTTGTAATAAAATTAATAGCACCCAAAATAGAAGACGCACCAGCTAAATGAAGAGAAAAAATAGTAAAATCAACAGAGCTTCCTGCATGCGCAATTCCCCCCGCCAATGGCGGATAGACAGTTCACCCAGTCCCCGTACCACTTTCAACCAACGACGAACTAATCAACAAAATAAATGATGGAGGAAGCAGTCAAAAACTTAAATTATTTAACCGCGGAAAAGCTATGTCTGGAGCCCCTAATATCAAAGGCACCAATCAATTACCAAATCCACCAATTATAATAGGTATCACTATAAAAAAAATTATTACAAATGCGTGGCTTGTGACAATAACATTATAAATCTGGTCATCCCCAATTAAACTCCCAGGAAACCCTAATTCAGTACGAATGATTATACTCATCGCAGTTCCTACTATGGCAGCTCNT
>HM888097-Glomeris_connexa
ATCAAAAAAAGTAGTATTAAAATTTCGATCCGTTAACAACATTGTAATTCCTCCAGCTAAAACAGGTAGGGATAATAATAATAAAATTGCAGTAATTTTTACTGCCCATACAAATAAAGGTATTCGCTCTAACAATATTCCTCTAGTTCGCATATTTAAAATTGTTGTAATAAAATTAATAGCCCCTAAAATAGAAGATGCTCCAGCCAGGTGCAAAGAAAAAATAGTAAAATCTACAGATCTTCCTGCATGTGCAATTCCGCCTGCTAAAGGAGGATAGACAGTTCATCCCGTTCCTGTCCCACTTTCAACTAAAGAGGAACTAATTAACAAAATAAAAGAAGGAGGCAATAATCAAAAACTTAAATTATTTAACCGAGGAAAGGCTATATCAGGAGCGCCTAACATTAAAGGTACTAATCAATTTCCAAACCCACCAATTATAATGGGTATCACCATAAAGAAAATTATTACAAAAGCATGACTTGTCACAATAACATTATAAATTTGATCATCCCCAATTAAGCTCCCCGGAAACCCTAATTCAGTCCGAATAATTATTCTTATAGCCGTACCAACCATAGCGGCCCAC

>HM888093-Glomeris_pustulata
ATCAAAAAAAGTAGTATTAAAATTACGATCTGTTAATAATATAGTAATTCCCCCAGCTAACACCGGCAGAGAAAGTAATAACAAAATCGCAGTAAGCTTAACAGCTCATACAAATAAAGGCATACGTTCTAATAACATCCCACTCGTTCGTATGTTTAAAATAGTTGTAATAAAATTAATAGCCCCTAAAATAGAAGAAGCCCCAGCTAAATGTAAAGAAAAAATAGTAAAATCCACAGAACTTCCCGCATGCGCAATTCCTCCCGCTAAAGGAGGATAAACAGTTCATCCTGTTCCTGTCCCACTCTCAACTAATGACGAACTAATTAATAAAATAAATGAAGGGGGTAATAGTCAAAAACTTAAATTATTTAATCGGGGAAAAGCCATATCAGGAGCCCCTAATATTAACGGCACCAACCAATTTCCAAATCCTCCGATTATAATAGGCATCACTATAAAAAAAATTATTACAAAAGCATGTCTAGTAACAATAACATTATAAATTTGGTCATCCCCAATTAAACTCCCAGGAAACCCCAACTCTGTACGAATAATTATACTTATAGCAGTTCCTACTATAGCAGCTCAC
>KX714046-Glomeris_primordialis
ATCAAAAAAAGTAGTGTTAAAATTTCGATCCGTTAATAACATTGTAATTCCNCCTGCTAATACCGGTAAAGACAATAATAATAAAATGGCCGTAAGTTTAACTGCTCACACAAAAAAAGGTATTCGTTTTAATAGTATTCCTCTAGTTTGTATATTTAAAATAGTAGTAATAAAATTAATAGCCCCTAAAATAGAAGAAGCTCCCGCCAAATGGAGAGAAAAAATAGTAAAATCTACAGATCTTCCTGCATGGGCAATTCCCCCTGCCAAAGGGGGGTAAACTGTTCATCCCGTTCCTGTTCCACTTTCAACTAATGAAGAACTAATTAATAAAATAAAAGAAGGGGGAAGAAGTCAAAAACTTAAATTATTTAATCGAGGAAAAGCCATATCTGGTGCCCCTAACATTAATGGGACTAACCAATTTCCAAATCCTCCAATTATAATGGGCATTACCATAAAAAAAATTATTACAAATGCATGGCTTGTAACAATAACATTATAAATTTGATCATCTCCAATTAAACTCCCTGGAAACCCTAACTCAGTACGAATAATTATTCTTATTGCAGTCCCTACCATAGCTGCCCAT
>KX714040-Glomeris_oropensis
GTCAAAAAAAGTAGTGTTAAAATTTCGATCTGTTAATAACATGGTGATTCCCCCTGCTAATACTGGTAAAGACAACAATAATAAAATCGCAGTGAGTTTTACCGCCCATACAAACAATGGTATTCGTTCTAATAACATTCCACTAGTTCGTATATTTAAAATAGTAGTAATAAAATTAATAGCCCCTAAAATAGAAGAAGCCCCTGCCAAATGAAGGGAAAAAATAGTAAAATCAACAGATCTTCCTGCATGGGCAATTCCTCCTGCCAGAGGAGGATACACTGTTCAACCTGTCCCCGTTCCACTTTCAACTAATGAAGAACTAATTAATAAAATAAATGAAGGAGGAAGTAGTCAAAAACTTAAATTATTTAATCGAGGAAAAGCCATATCCGGAGCTCCTAATATTAGTGGTACTAGCCAATTACCAAATCCCCCAATTATAATAGGCATAACCATAAAAAAAATTATTACAAACGCATGTCTTGTAACAATGACATTATAAATTTGGTCATCACCAATTAAACTCCCAGGAAACCCTAACTCAGTACGAATAATTATTCTTATTGCAGTTCCTACCATGGCCGCTCAT
>KR997500-Glomeris_ornata
ATCAAAAAAAGTGGTATTAAAATTTCGATCTGTTAAGAGCATAGTAATTCCACCAGCTAGTACCGGTAAAGACAACAACAATAAAATCGCAGTTAATTTAACGGCTCACACAAATAAAGGCATTCGTTCTAATAATATTCCTCTAGTTCGCATATTTAAAATAGTTGTAATAAAATTAATAGCACCCAAAATAGAAGATGCTCCCGCTAAGTGTAAAGAAAAAATAGTAAAATCAACAGAACTTCCTGCATGCGCAATTCCTCCTGCTAAAGGGGGATATACAGTTCAACCTGTTCCTGTCCCACTTTCCACTAAAGAAGAACTAATCAATAAAATAAATGAAGGAGGAAGTAGTCAAAAACTTAAATTATTTAATCGAGGAAAAGCCATATCTGGAGCTCCCAATATTAACGGCACCAATCAATTTCCAAATCCACCAATTATAATCGGTATAACCATAAAAAAAATTATTACAAATGCATGGCTCGTAACAATAACATTGTAAATTTGATCGTCTCCAATTAAACTCCCAGGAAACCCTAACTCAGTACGAATAATTATGCTTATTGCAGTTCCCACTATAGCAGCTCAT
>KX714044-Glomeris_oblongoguttata
ATCAAAGAAAGTAGTATTAAAATTTCGATCTGTTAATAATATTGTAATCCCTCCAGCTAATACCGGTAAAGATAATAATAATAAAATTGCAGTAAGCTTAACAGCTCATACAAACAACGGTATACGTTCTAACAGCATTCCACTAGTTCGTATGTTTAAAATAGTAGTAATAAAATTAATTGCCCCTAAAATAGAAGAAGCTCCTGCTAAGTGAAGAGAGAAAATAGTAAAATCAACAGAACTCCCCGCATGCGCAATCCCCCCTGCCAAAGGTGGATATACTGTTCATCCTGTTCCTGTTCCACTCTCTACCAATGAAGAACTAATTAATAAAATAAATGAAGGAGGAAGAAGTCAGAAACTTAAATTATTTAATCGAGGAAAAGCCATATCTGGTGCCCCTAATATTAATGGCACTAACCAATTACCAAAACCACCAATTATAATAGGTATTACCATGAAAAAAATTATTACAAATGCATGGCTTGTAACAATAACATTATAAATTTGATCATCTCCAATTAAACTCCCAGGAAACCCCAGTTCAGTACGAATAATTATTCTTATAGCAGTTCCTACCATAGCTGCTCAT
>HM888090-Glomeris_malmivaga
ATCAAAAAAAGTGGTATTAAAATTTCGATCTGTTAAGAGCATAGTAATTCCACCAGCTAATACCGGTAAAGACAACAACAATAAAATCGCAGTTAATTTAACGGCTCACACAAATAAAGGCATTCGTTCTAATAATATTCCTCTAGTTCGCATATTTAAAATAGTTGTAATAAAATTAATAGCACCCAAAATAGAAGATGCTCCCGCTAAGTGTAAAGAAAAAATAGTAAAATCAACAGAACTTCCTGCATGCGCAATTCCTCCTGCTAAAGGGGGATATACAGTTCAACCTGTTCCTGTCCCACTTTCCACTAAAGAAGAACTAATCAATAAAATAAATGAAGGAGGAAGTANTCAAAAACTTAAATTATTTAATCGAGGAAAAGCCATATCTGGAGCTCCCAATATTAACGGTACCAATCAATTTCCAAATCCACCAATTATAATCGGTATAACCATAAAAAAAATTATTACAAATGCATGGCTCGTAACAATAACATTGTAAATTTGATCATCTCCAATTAAACTCCCAGGAAACCCTAANTCAGTACGAATAATTATNCTTATTGCAGTTCCCACTATAGCNGCTCAT
>KT188949-Glomeris_ligurica
ATCAAAAAAAGTAGTATTAAAATTTCGATCCGTTAACAACATTGTAATCCCTCCAGCTAAAACAGGTAACGATAACAATAACAAAATAGCAGTAATTTTTACTGCCCACACAAATAAAGGCATTCGCTCTAACAACATTCCTCTCGTTCGTATATTCAAAATCGTTGTAATAAAATTAATGGCTCCTAAAATAGATGAAGCTCCAGCCAAATGCAGAGAGAAAATAGTAAAATCTACAGATCTTCCTGCATGAGCAATCCCTCCCGCTAATGGAGGATATACAGTTCACCCCGTCCCTGTCCCTCTTTCAACTAAAGAAGAACTGATTAACAAAATAAAAGAAGGGGGAAGCAGCCAAAATCTTAAATTATTTAATCGAGGAAAAGCCATGTCTGGAGCCCCCAACATTAGAGGTACTAATCAATTCCCAAAGCCACCAATTATAATAGGTATCACCATAAAAAAAATCATTACAAATGCATGGCTAGTTACAATAACATTATAAATTTGATCATCCCCAATTAAACTCCCAGGAAATCCTAACTCAGTTCGAATAATTATTCTTATTGCAGTCCCAACTATAGCTGCTCAT
>KX714071-Glomeris_klugii
ATCAAAAAAAGTAGTATTAAAATTTCGATCCGTTAATAATATTGTAATACCTCCTGCTAATACCGGTAAAGACAATAATAATAAAATGGCCGTAAGTTTAACCGCCCACACAAATAATGGTATTCGTTCTAATAATATGCCACTAGTTCGTATGTTCAAAATAGTAGTAATAAAATTAATAGCCCCTAAAATAGAAGAGGCTCCTGCCAAATGAAGAGAGAAAATAGTAAAATCTACAGATCTTCCCGCATGCGCAATTCCCCCTGCTAAAGGTGGATACACAGTTCATCCTGTTCCCGTTCCACTTTCAACTAATGACGAACTAATTAATAAAATAAATGAAGGGGGAAGAAGTCAAAAACTTAAATTATTTAATCGAGGAAAAGCCATATCTGGTGCCCCTAACATTAATGGAACTAATCAATTACCAAACCCCCCAATTATAATGGGCATTACCATAAAAAAAATCATTACAAACGCATGACTTGTAACAATGACATTATAAATTTGGTCATCTCCAATTAAACTCCCAGGAAAGCCCAACTCAGTACGAATAATTATTCTTATTGCAGTTCCTACTATAGCAGCTCAT
>JQ074182-Glomeroides_primus
ATCAAAAAATGAAGTATTAAAATTTCGATCTGTTAATAATATTGTAATTCCTCCTGCTAACACAGGTAAAGACAGCAATAATAAAATTACAGTAATTTTAACAGCTCAAACAAATAGAGGTATTCGTTCTAATAATATTCCCTTAGTTCGTATATTTAAAATTGTTGTAATAAAATTAATAGCCCCTAAAATAGAAGATGCCCCAGCTAGGTGTAAAGAGAAAATAGTAAAATCTACAGAGCTTCCTGCATGTGCTAAACTCCCGGCTAAAGGAGGATAAACAGTTCAACCAGTGCCAGCTCCTCTTTCAACTAAAGAAGATCTCATTAATAAAATAAATGATGGGGGCAACAATCAAAAACTTAAATTATTTAATCGTGGAAATGCTATGTCTGGTGCTCCCAGTATTAGTGGAATCAATCAATTTCCAAATCCTCCAATTATAATTGGCATAACCATAAAAAAAATTATTACAAAAGCATGACTAGTAACAATTACATTATAAATTTGATCGTCTCCAATTAAACTACCAGGAAATCCTAATTCCGTTCGAATAATTACTCTTATGGCTGTACCTACTATAGCCGCTCAA
>JQ074181-Glomeridella_minima
ATCAAAAAAAGTAGTATTAAAATTTCGATCTGTTAATAATATAGTAATCCCTCCAGCTAATACAGGTAAAGATAATAATAATAAAATAGCTGTAATTTTTACCGCCCAAACAAATAGTGGTATTCGTTCTAATAATATCCCTCTAGTTCGTATATTCAAAATAGTAGTAATAAAATTAATAGCCCCTAAAATTGAAGAAGCCCCAGCCAAGTGTAAAGAAAAAATAGTAAAATCAACTGAGCTTCCAGCATGAGCAATACCTGCAGCCAAAGGAGGATATACAGTCCATCCTGTTCCTGTTCCTCTTTCAACTAAAGATGAACTAATTAATAAAATAAAAGAAGGCGGGAGTAATCAAAAACTCAAATTATTTAATCGCGGAAAAGCCATATCTGGTGCTCCTAATATAAGAGGAACTAATCAATTACCAAAACCACCAATTATAATGGGCATTACTATAAAAAAAATTATAACAAAAGCGTGTCTAGTAACAATTACATTATAAATCTGATCATCTCCAATTAATCTCCCAGGAAATCCTAATTCAGTTCGAATAATTATTCTCATCGCAGTACCTACTATTGCAGCTCAT
>HM888088-Glomeridella_minima_bitaeniata
ATCAAAAAAAGTAGTATTAAAATTTCGATCTGTTAATAATATAGTAATCCCTCCAGCTAATACAGGTAAAGATAATAATAATAAAATAGCTGTAATTTTTACCGCCCAAACAAATAGTGGTATTCGTTCTAATAATATCCCTCTAGTTCGTATATTCAAAATAGTAGTAATAAAATTAATAGCCCCTAAAATTGAAGAAGCCCCAGCCAAGTGTAAAGAAAAAATAGTAAAATCAACTGAGCTTCCAGCATGAGCAATACCTGCAGCCAAAGGAGGATATACAGTCCACCCTGTTCCTGTTCCTCTTTCAACTAAAGATGAACTAATTAATAAAATAAAAGAAGGCGGGAGTAATCAAAAACTCAAATTATTTAATCGCGGAAAAGCCATATCTGGTGCTCCTAATATAAGAGGAACTAATCAATTACCAAAACCACCAATTATAATGGGCATTACTATAAAAAAAATTATAACAAAAGCGTGTCTAGTAACAATTACATTATAAATCTGATCATCTCCAATTAATCTCCCAGGAAATCCTAATTCAGTTCGAATAATTATTCTCATCGCAGTACCTACTATTGCAGCTCAT
>KP205575-Eupeyerimhoffia_archimedis
GTCAAAAAAAGTAGTATTAAAATTTCGATCTGTTAATAATATAGTAATTCCTCCTGCCAATACAGGTAATGATAATAATAATAAGACAGCAGTAATTTTTACAGCTCAAACAAACAAAGGTATCCGTTCTAATAATATTCCTCTTGTCCGCATATTTAAAATAGTGGTAATAAAATTAATTGCCCCTAAAATAGATGATGCTCCCGCTAAATGTAAAGAAAAAATAGTAAAATCAACAGAACTCCCAGCATGAGCTAATCTTCCTGCTAAAGGAGGATACACCGTTCATCCTGTCCCAGTTCCACTTTCAACTAAAGAAGAACTAATTAATAAAATAAAGGAAGGAGGTAAAAGCCAAAATCTTAAATTATTCAATCGAGGAAAAGCTATATCCGGCGCTCCTAATATTAATGGCACAAGTCAATTCCCAAACCCTCCAATTATAATAGGTATAACCATAAAAAAAATTATAACAAAAGCATGTCTAGTAACAATTACATTATAAATTTGATCATCACCAATCAATCTTCCGGGAAAACCAAGTTCAGTCCGAATAATTATTCTTATAGCTGTCCCAACCATCGCAGCTCAT
